# Supplementary material for: In Silico and In Vitro Studies of Alchemilla viridiflora Rothm—Polyphenols’ Potential for Inhibition of SARS-CoV-2 Internalization
Source: MDPI journal article supplement (doi:10.3390/molecules27165174), 2022-08-14
Supplement: s1 [file s1]

## Supplementary materials

### 1. Chemical analysis

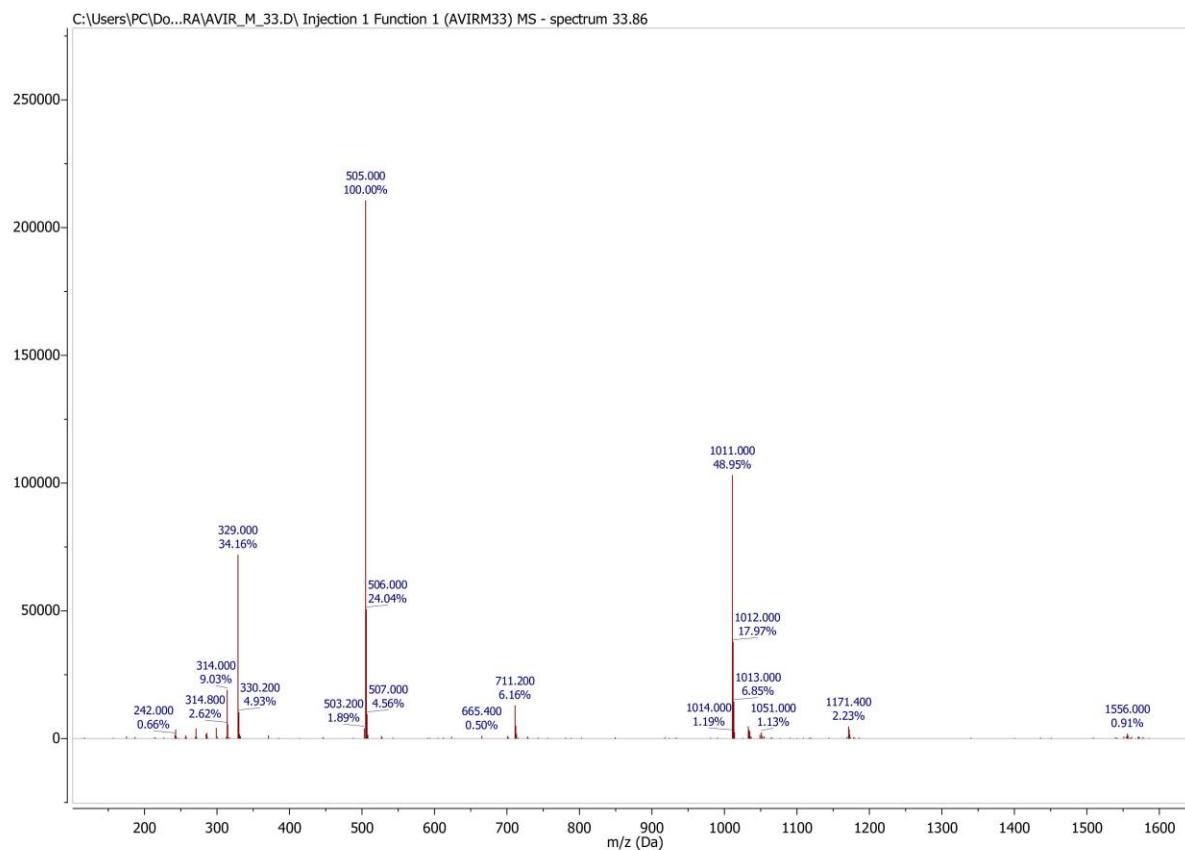

**Figure S1.** *A. viridiflora* methanol extract mass spectrum

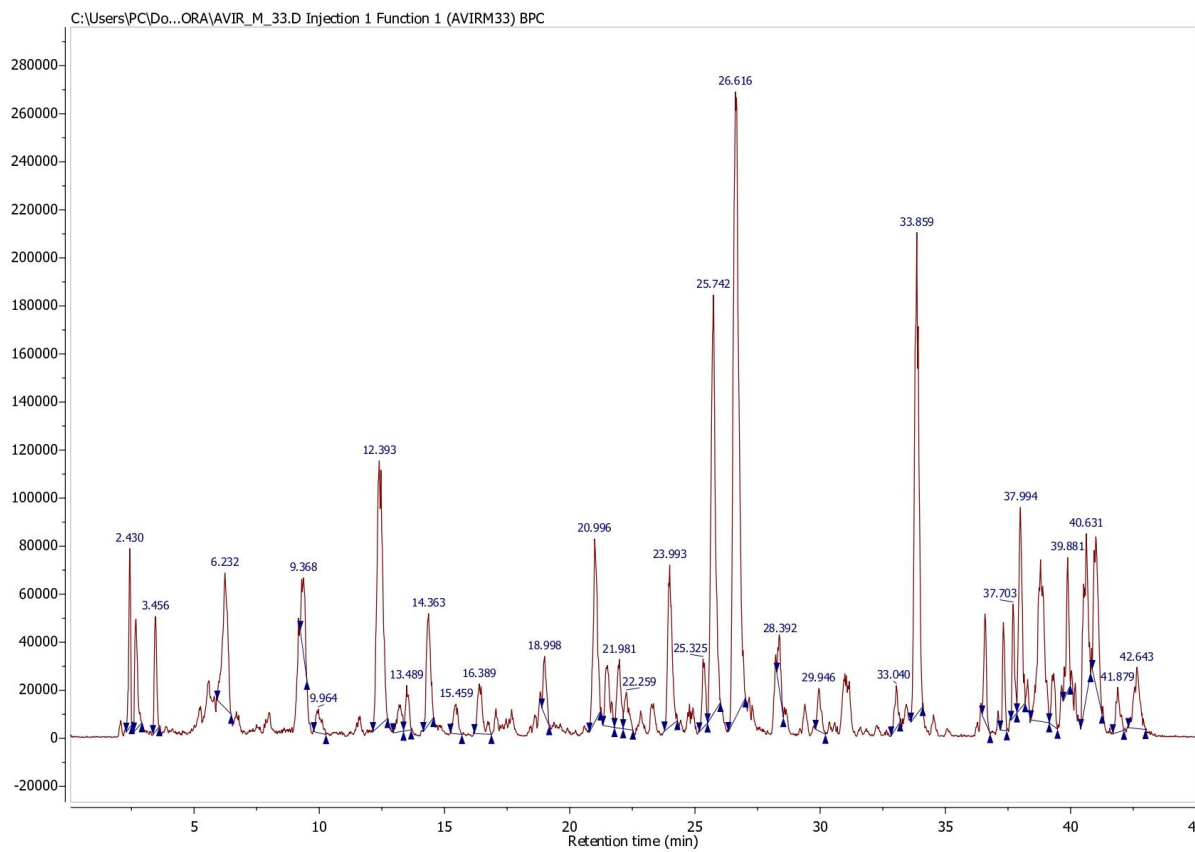

**Figure S2.** *A. viridiflora* methanol extract base peak chromatogram

## 2. Molecular docking simulations

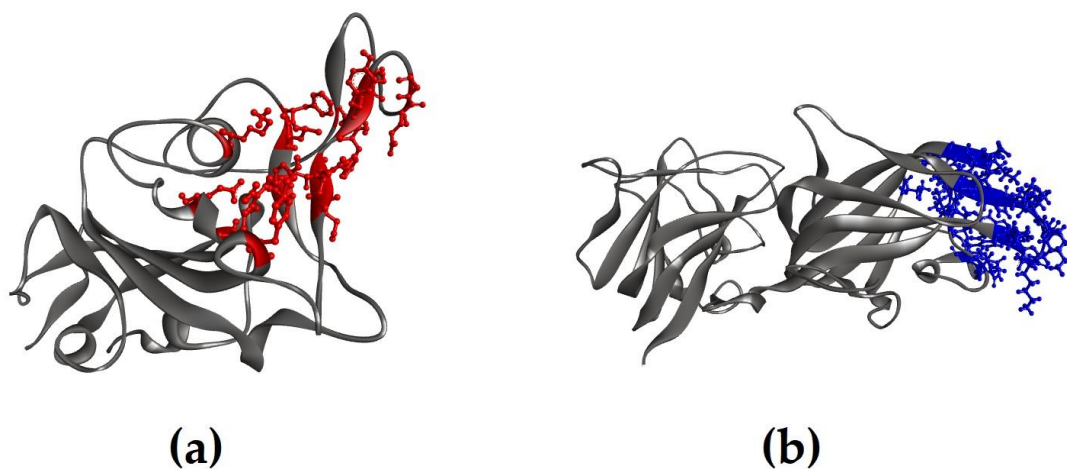

**Figure S3.** Graphical presentation of binding pockets with constituent amino acid residues (ball and stick display style) for protein targets used in docking simulations (a) S-glycoprotein (PDB:7BZ5) with binding pocket residues marked red ; (b) Neuropilin-1 (PDB:2QQI) with binding pocket residues marked blue

**Table S1.** Binding pocket residues list for protein targets used in docking simulations

| <b>Spike (PDB:7BZ5)</b> | <b>Neuropilin-1 (PDB:2QQI)</b> |
|-------------------------|--------------------------------|
| Arg70                   | Tyr297                         |
| Glu73                   | Ser298                         |
| Lys84                   | Asn300                         |
| Tyr120                  | Trp301                         |
| Leu122                  | Asn313                         |
| Phe123                  | Thr316                         |
| Ile139                  | Pro317                         |
| Glu151                  | Gly318                         |
| Gly152                  | Glu319                         |
| Cys155                  | Asp320                         |
| Tyr156                  | Ser321                         |
| Phe157                  | Glu324                         |
| Leu159                  | Ile345                         |
| Gln160                  | Ser346                         |
| Ser161                  | Lys347                         |
| Tyr172                  | Glu348                         |
|                         | Thr349                         |
|                         | Lys350                         |
|                         | Lys351                         |

|  |        |
|--|--------|
|  | Lys352 |
|  | Tyr353 |
|  | Tyr354 |
|  | Trp411 |
|  | Glu412 |
|  | Thr413 |
|  | Gly414 |
|  | Ile415 |
|  | Ser416 |

### 3. Molecular dynamic simulations

The trajectory of Quercetin 3-(6"-ferulylglucoside) in complex with S-glycoprotein (PDB ID: 7BZ5) has been analyzed with YASARA version 20.12.24.W.64 over a period of 12.50 nanoseconds with 51 snapshots and the AMBER14 force field.

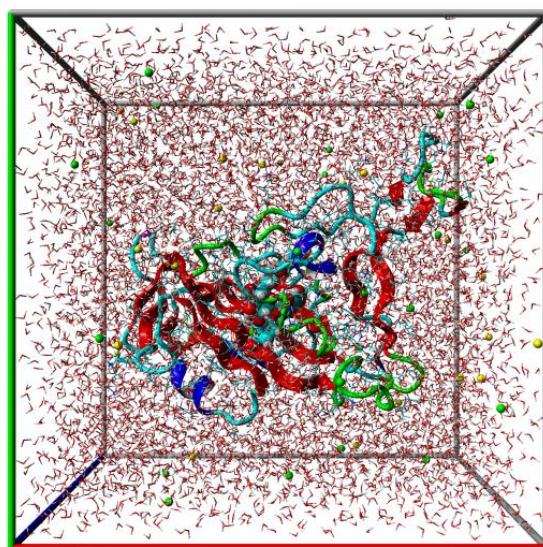

**Figure S4.** A ray-traced picture of the simulated system. The simulation cell boundary is set to periodic

**Table S2.** Composition of the simulated system

| Type              | Number |
|-------------------|--------|
| Protein molecules | 1      |
| Protein residues  | 194    |

|                           |       |
|---------------------------|-------|
| Protein atoms             | 2998  |
| Nucleic acid molecules    | 0     |
| Nucleic acid residues     | 0     |
| Nucleic acid atoms        | 0     |
| Residue LIG with 74 atoms | 1     |
| Element Cl                | 26    |
| Element Na                | 23    |
| Water residues            | 8965  |
| Total number of atoms     | 30016 |

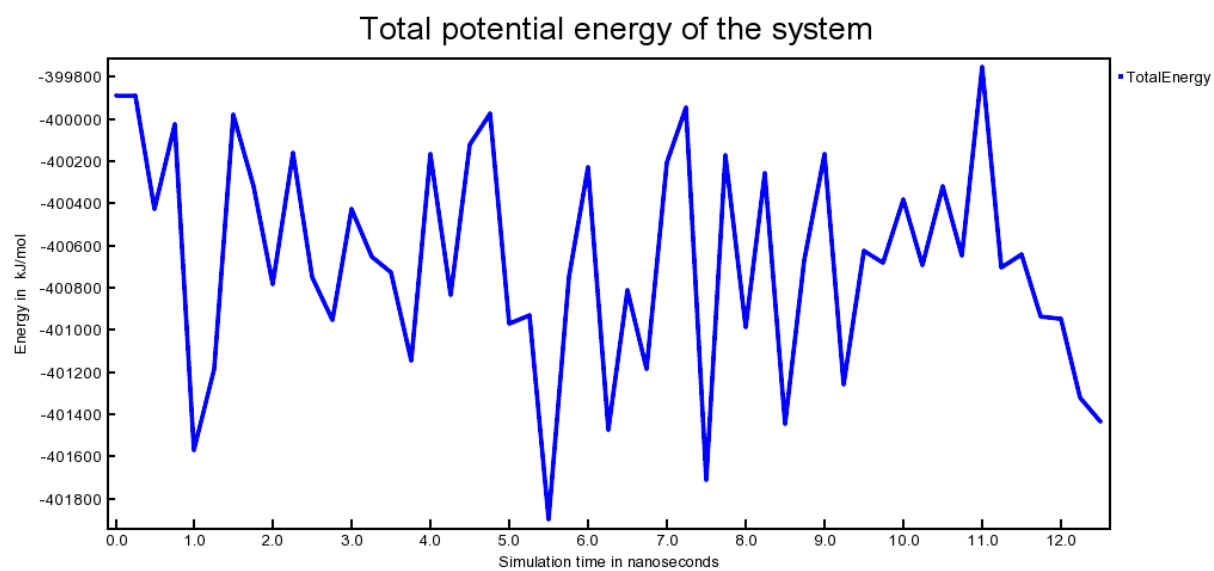

**Figure S5.** Total potential energy of the system [vertical axis] as a function of simulation time [horizontal axis]

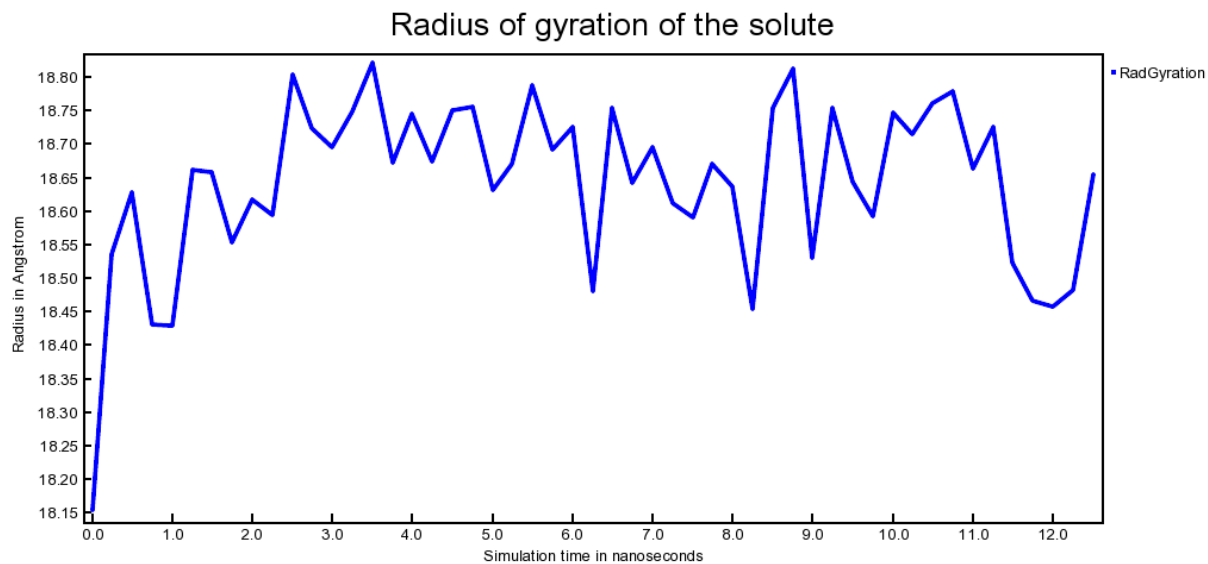

**Figure S6.** Radius of gyration of the solute [vertical axis] as a function of simulation time [horizontal axis]

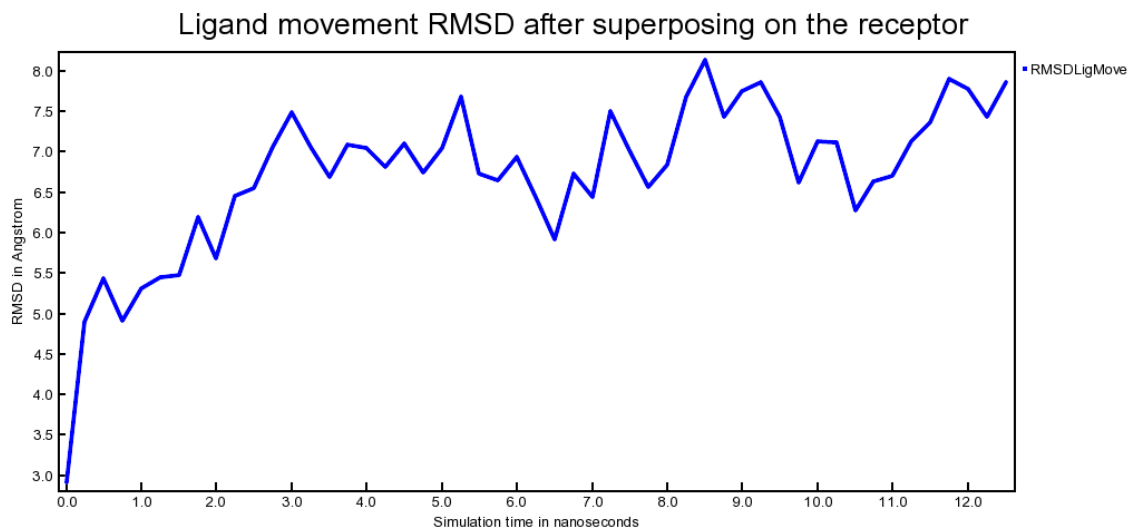

**Figure S7.** Ligand movement root mean square deviation (RMSD) after superposing on the receptor [vertical axis] as a function of simulation time [horizontal axis].
